# Supplementary material for: Momentum and thickness dependent excitonic and plasmonic properties of 2D h-BN and MoS2 restored from supercell calculations
Source: Royal Society of Chemistry journal article supplement (doi:10.1039/d3na00670k), 2023-01-01
Supplement: d3na00670k1.pdf [file d3na00670k1.pdf]

## Supplementary Information

# Momentum and thickness dependent excitonic and plasmonic properties of 2D h-BN and MoS<sub>2</sub> restored from supercell calculations

*Guang Yang,<sup>a</sup> Jiachen Fan<sup>a</sup> and Shang-Peng Gao<sup>a, b\*</sup>*

<sup>a</sup>Department of Materials Science, Fudan University, Shanghai 200433, P. R. China

<sup>b</sup>Yiwu Research Institute of Fudan University, Yiwu, Zhejiang 322000, P. R. China

\*Email: [gaosp@fudan.edu.cn](mailto:gaosp@fudan.edu.cn)

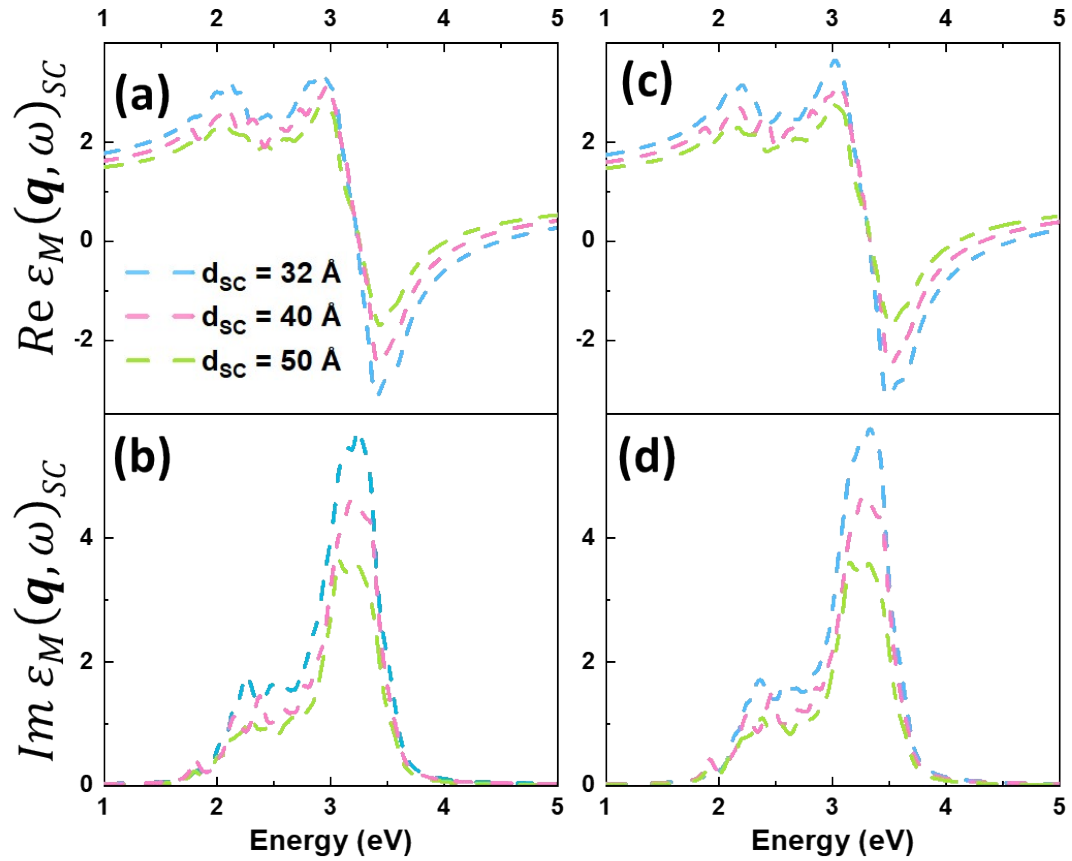

**Fig. S1** Unrestored (a and c) real and (b and d) imaginary dielectric functions at finite momentum ( $|\mathbf{q}| = 0.05 \text{ \AA}^{-1}$ ) along  $\Gamma\text{M}$  of monolayer  $\text{MoS}_2$  calculated within the many body perturbation theory with different vacuum volumes, resulting different supercells thicknesses  $d_{\text{SC}}$  from 32  $\text{\AA}$ , 40  $\text{\AA}$  to 50  $\text{\AA}$ . Note that the dielectric functions in (a-b) are calculated with the Coulomb truncation while the dielectric functions in (c-d) are calculated without the Coulomb truncation.

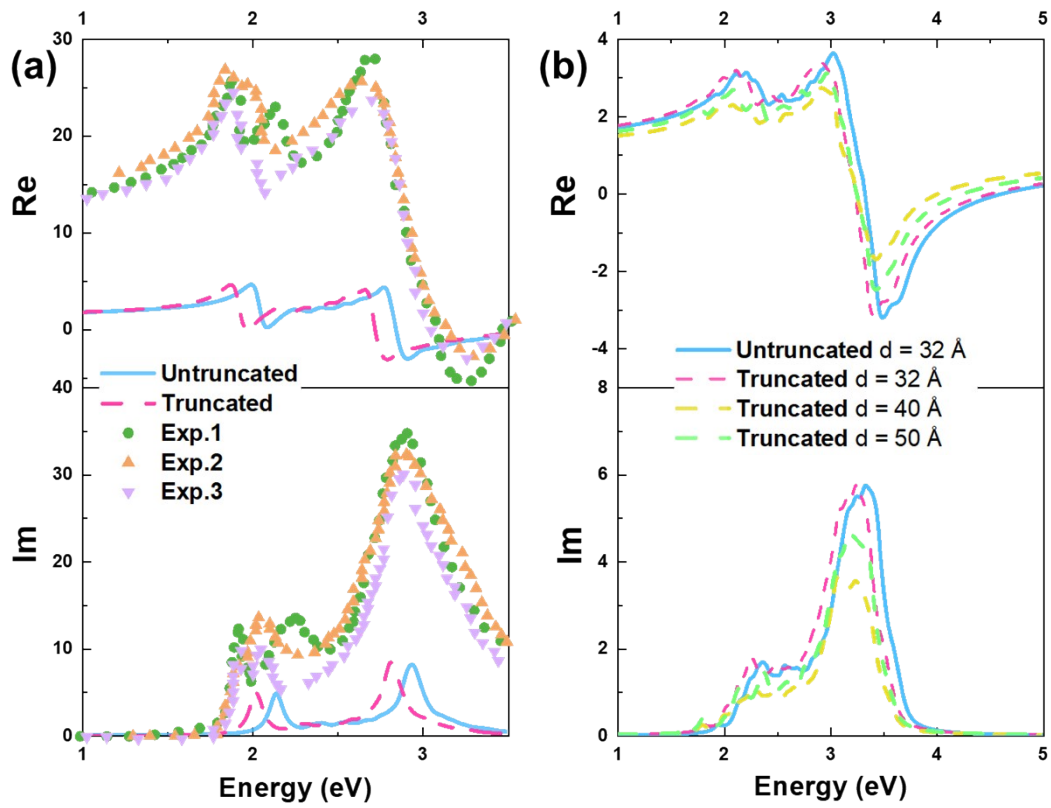

**Fig. S2** The dielectric functions of monolayer MoS<sub>2</sub> at (a)  $q = 0$  and (b)  $q = 0.05 \text{ \AA}^{-1}$ . Note that the untruncated and truncated results are depicted in full lines and dashed lines, respectively, compared with experimental results <sup>1-3</sup> in dots. The thicknesses of supercells are also noted in (b).

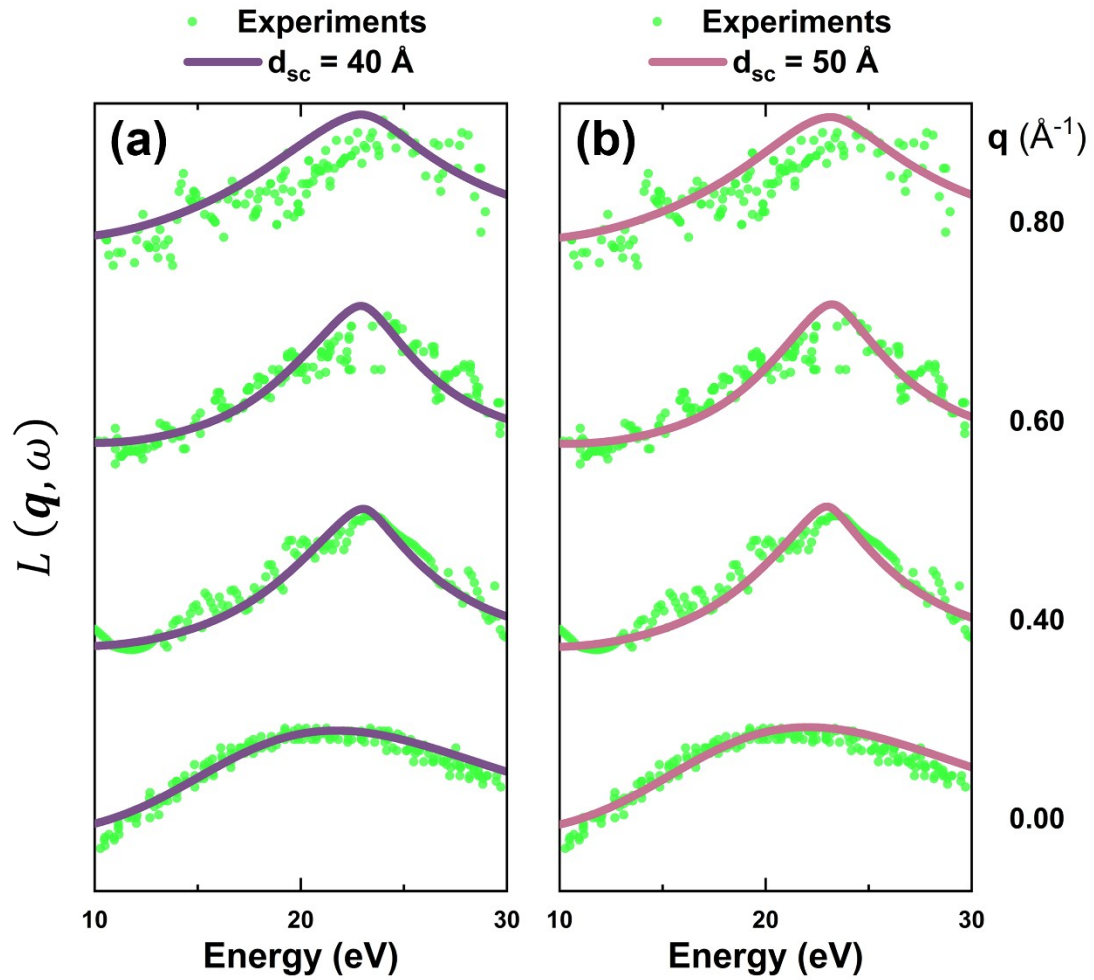

**Fig. S3** The restored energy-loss functions of monolayer MoS<sub>2</sub> compared with experimental measurements<sup>4,5</sup> (green dots) from vanishing  $\mathbf{q}$  to finite  $\mathbf{q}$  along  $\Gamma\text{M}$ . The restorations are based on different supercell thicknesses of (a) 40 Å and (b) 50 Å.

## References

1. G. A. Ermolaev, Y. V. Stebunov, A. A. Vyshnevyy, D. E. Tatarkin, D. I. Yakubovsky, S. M. Novikov, D. G. Baranov, T. Shegai, A. Y. Nikitin and A. V. Arsenin, *npj 2D Mater. Appl.*, 2020, **4**, 21.
2. W. Li, A. G. Birdwell, M. Amani, R. A. Burke, X. Ling, Y.-H. Lee, X. Liang, L. Peng, C. A. Richter and J. Kong, *Phys. Rev. B*, 2014, **90**, 195434.
3. M. S. Diware, K. Park, J. Mun, H. G. Park, W. Chegal, Y. J. Cho, H. M. Cho, J. Park, H. Kim and S.-W. Kang, *Curr. Appl Phys.*, 2017, **17**, 1329-1334.
4. J. N. Coleman, M. Lotya, A. O'Neill, S. D. Bergin, P. J. King, U. Khan, K. Young, A. Gaucher, S. De, R. J. Smith, I. V. Shvets, S. K. Arora, G. Stanton, H. Y. Kim, K. Lee, G. T. Kim, G. S. Duesberg, T. Hallam, J. J. Boland, J. J. Wang, J. F. Donegan, J. C. Grunlan, G. Moriarty, A. Shmeliov, R. J. Nicholls, J. M. Perkins, E. M. Grieveson, K. Theuwissen, D. W. McComb, P. D. Nellist and V. Nicolosi, *Science*, 2011, **331**, 568-571.
5. M. J. Mohn, R. Hambach, P. Wachsmuth, C. Giorgetti and U. Kaiser, *Phys. Rev. B*, 2018, **97**, 235410.
